# Supplementary material for: Interactions between Th(iv) and graphene oxide: experimental and density functional theoretical investigations
Source: Royal Society of Chemistry journal article supplement (doi:10.1039/c3ra45938a), 2013-10-26
Supplement: c3ra45938a.pdf [file c3ra45938a.pdf]

# Electronic Supplementary Information for

Interactions Between Th(IV) and Graphene Oxide:

Experimental and Density Functional Theoretical Investigations

Zhi-Qiang Bai<sup>a,b</sup>, Zi-Jie Li<sup>a</sup>, Cong-Zhi Wang<sup>a</sup>, Li-Yong Yuan<sup>a</sup>, Zhi-Rong Liu<sup>b</sup>, Jing Zhang<sup>c</sup>, Li-Rong Zheng<sup>c</sup>, Yu-Liang Zhao<sup>a</sup>, Zhi-Fang Chai<sup>\*a,d</sup> and Wei-Qun Shi<sup>\*a</sup>

<sup>a</sup> Group of nuclear energy nano-chemistry, Key Laboratory of Nuclear Radiation and Nuclear Energy Technology and Key Laboratory for Biomedical Effects of Nanomaterials and Nanosafety, Institute of High Energy Physics, Chinese Academy of Sciences, Beijing 100049, China.

<sup>b</sup> School of Nuclear Engineering and Geophysics, East China Institute of Technology, Nanchang 330013, China

<sup>c</sup> Beijing Synchrotron Radiation Facility, Institute of High Energy Physics, Chinese Academy of Sciences, Beijing 100049, China

<sup>d</sup> School of Radiological & Interdisciplinary Sciences, Soochow University, Suzhou 215123, China

**Corresponding Author**

E-mail: [shiwq@ihep.ac.cn](mailto:shiwq@ihep.ac.cn); [zfchai@suda.edu.cn](mailto:zfchai@suda.edu.cn)

### S-1. Details for synthesis of GO

Graphite oxide (GO) was prepared from natural graphite powder (Alfa Aesar, > 99.9995%) by the Hummers method using  $\text{NaNO}_3$ ,  $\text{H}_2\text{SO}_4$ , and  $\text{KMnO}_4$ .<sup>1</sup> The oxidation product was purified by rinsing with a 10% HCl solution, repeatedly washing with copious amounts of ultrapure water, and filtering through 0.22  $\mu\text{m}$  nylon filter paper. The filter cake was dried under vacuum (80 °C, 3 h) and the GO solid was obtained. Or re-dispersing the filter cake in ultrapure water with mild sonication (150 W, 4 h), then the exfoliated GO was obtained. The suspension was centrifuged at 4000 rpm for 20 min, and the supernatant was collected as a stock solution, which was used in the following sorption experiments.

### S-2. Characterization methods

The AFM images of GO were obtained in air by using a Veeco Nanoscope 5 system (Veeco Metrology) in a tapping mode. All the AFM samples were prepared by dripping a GO suspension (~0.02 g/L) on a silicon wafer, followed by drying in air. The morphology of GO was observed with SEM (S-4800, HITACHI) at an accelerating voltage of 1.0 kV. FT-IR spectroscopic measurements were amounted by using a PerkinElmer Spectrum GX FTIR system in KBr pellet. The XPS spectra were recorded on a scanning X-ray microprobe (PHI Quantera, ULVAC-PHI, Inc) with an Al  $K_\alpha$  source ( $E=1486.7\text{eV}$ ). Raman spectra were recorded from 3500 to 800  $\text{cm}^{-1}$  on a Renishaw RM 2000 Microscopic Confocal Raman spectrometer with a 514 nm argon ion laser.

### S-3. The kinetic models.

The linear form of the pseudo-first-order and the pseudo-second-order are expressed as followed respectively.

$$\text{The pseudo-first-order equation: } \log(q_e - q_t) = \log q_e - \frac{k_1 t}{2.303} \quad (\text{S1})$$

$$\text{The pseudo-second-order equation: } \frac{t}{q_t} = \frac{1}{k_2 q_e^2} + \frac{t}{q_t} \quad (\text{S2})$$

where  $q_e$  (mg/g) and  $q_t$  (mg/g) are the quantities of the sorbed Th(IV) at equilibrium and at time  $t$  respectively,  $k_1$  (1/min) and  $k_2$  (g/(mg·min)) are the pseudo-first-order

and pseudo-second-order sorption rate constants.

#### S-4. The Langmuir and Freundlich isotherm models.

The Langmuir model assumes that the sorption of metal ions occurs on a homogenous surface by monolayer sorption and there no interaction between adsorbed ions, with homogeneous binding sites and equivalent sorption energies. The linear equation of the Langmuir isotherm model is expressed as followed:

$$\frac{C_e}{q_e} = \frac{1}{q_m k_L} + \frac{C_e}{q_m} \quad (\text{S3})$$

where  $q_m$  is the maximum sorption capacity corresponding to complete monolayer coverage (mg/g) and  $k_L$  is a constant indirectly related to sorption capacity and energy of sorption (L/mg), which characterizes the affinity of the adsorbate with the adsorbent. The linearized plot was obtained when we plotted  $C_e/q_e$  against  $C_e$  and  $q_m$  and  $k_L$  could be calculated from the slope and intercept.

The Freundlich equation is an empirical equation with the assumption of sorption on a heterogeneous surface. The linear equation can be expressed by:

$$\ln q_e = \ln k_F + \frac{1}{n} \ln C_e \quad (\text{S4})$$

where  $k_F$  and  $n$  are the Freundlich constants related to the sorption capacity and the sorption intensity, respectively. The linear plot was obtained by plotting  $\ln q_e$  against  $\ln C_e$ , and the values of  $k_F$  and  $n$  were calculated from the slope and intercept of the straight line.

#### S-5. Calculation of Thermodynamic Data.

The standard Gibbs free energy ( $\Delta G^0$ ), standard enthalpy ( $\Delta H^0$ ) and entropy ( $\Delta S^0$ ) can be calculated from the equations followed:

$$\ln K_d = \frac{\Delta S^0}{R} - \frac{\Delta H^0}{RT} \quad (\text{S5})$$

$$\Delta G^0 = \Delta H^0 - T\Delta S^0 \quad (\text{S6})$$

where  $K_d$  is the distribution coefficient (ml/g) of Th(IV) in sorbent and in solution,  $T$  represents the absolute temperature (K), and  $R$  denotes the ideal gas constant (8.314 J/(mol·K)).

### S-6. Samples preparation and analysis of EXAFS data

The reference sample of precipitate of Th(IV) hydrous oxide or hydroxide was prepared in air by slow titration of a thorium nitrate solution with NaOH. The samples of Th(IV)-loaded GO for EXAFS measurement were prepared in the same batch experiments. After sorption processes, samples were centrifuged at 10000 rpm for 1 h to concentrate the solid phases. The sediments were mounted in the holes of Teflon sample holders, sealed with Kapton tape, and subjected to EXAFS measurements. A silicon (111) double-crystal monochromator was used to tune the incident X-ray beam to the desired energies. EXAFS data analysis is based on standard least-squares fitting techniques using the Athena software. The region to about 700 eV above the Th L3-edge ( $k \sim 13.5 \text{ \AA}^{-1}$ ) is investigated. Rbkg 1.2 was used to optimize the atomic background function ( $\mu_0$ ) using the autobk utility. To extract metric parameters (neighboring atomic distances  $R$ , EXAFS Debye-Waller factors ( $\sigma^2$ ), coordination numbers ( $N$ )) from the EXAFS, the theoretical phase shift and amplitude functions for single and double scattering paths are calculated by the program FEFF6 and optimized as implemented in the FEFFIT code using the model structure of thorium oxalate. Prior to analysis, the  $k^3$ -weighted EXAFS spectra are Fourier transformed over a  $k$ -space range of  $\sim 2.9$ - $9.7 \text{ \AA}^{-1}$ , using symmetric square windows with  $\Delta k = 0.1 \text{ \AA}^{-1}$  "Hanning sills". All the fitting operations are performed in  $R$ -space over the individual radial distance ranges of  $\sim 1.47$ - $2.8 \text{ \AA}$ .

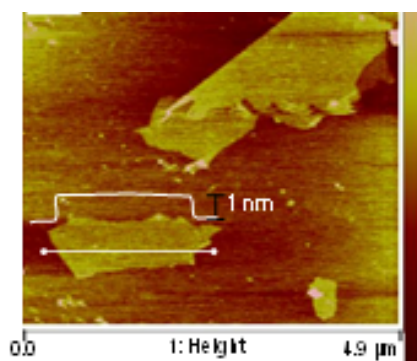

Figure S1. AFM image of GO

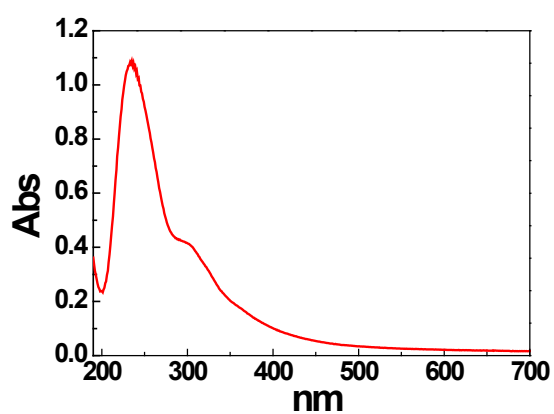

Figure S2. UV-Vis spectra of GO. Peaks at about 230 nm and a shoulder at 300 nm, which correspond to the  $\pi$ - $\pi^*$  transition of aromatic C=C bonds and the  $n$ - $\pi^*$  transition of C=O bonds

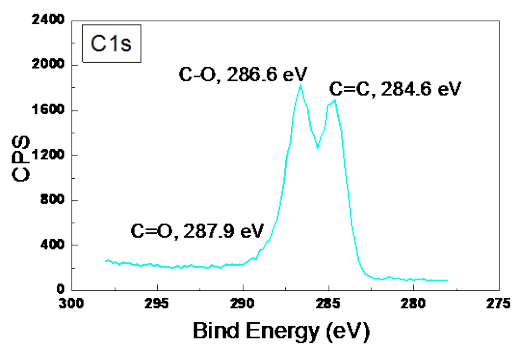

Figure S3. GO C1s XPS analysis. 284.8 (48.4%), 286.6 (47.6%), and 287.9 eV (4.0%) were assigned to the graphitic C=C bonds, C-O and C=O functional groups, respectively

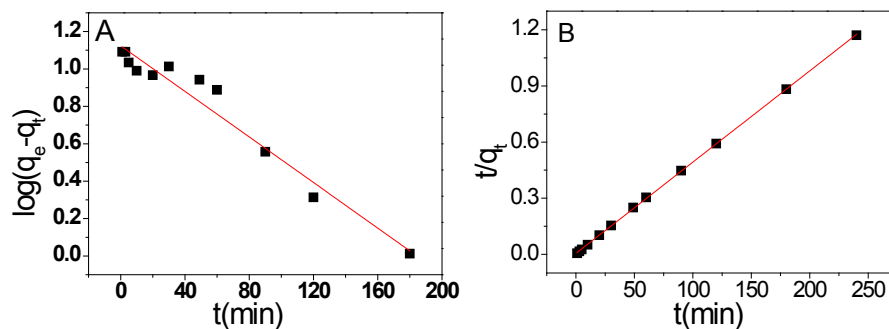

**Figure S4.** (A) The pseudo-first-order kinetic model and (B) pseudo-second-order kinetic model linearized plots for Th (IV) sorption on GO.

**Table S1.** The kinetic constants of the Th(IV) sorption onto GO.

| pseudo-first-order kinetic model |                    |       | pseudo-second-order kinetic model |                        |       |
|----------------------------------|--------------------|-------|-----------------------------------|------------------------|-------|
| $q_e(\text{mg/g})$               | $K_1(/\text{min})$ | $R^2$ | $q_e(\text{mg/g})$                | $K_2(\text{g/mg/min})$ | $R^2$ |
| 13.29                            | 0.014              | 0.954 | 204.92                            | 0.0048                 | 0.999 |

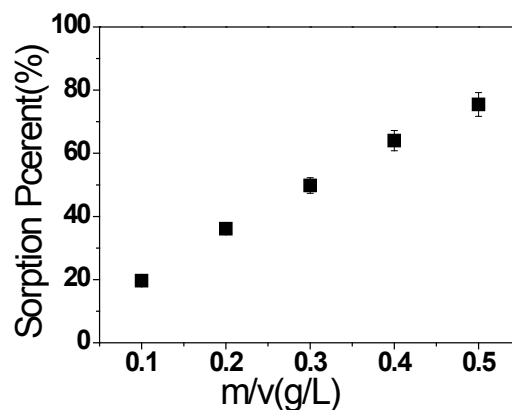

**Figure S5.** The effect of solid-to-liquid ratio on the Th(IV) sorption on GO.  $C_0(\text{Th})=120 \text{ mg/L}$  and  $\text{pH}=2.6\pm 0.05$ .

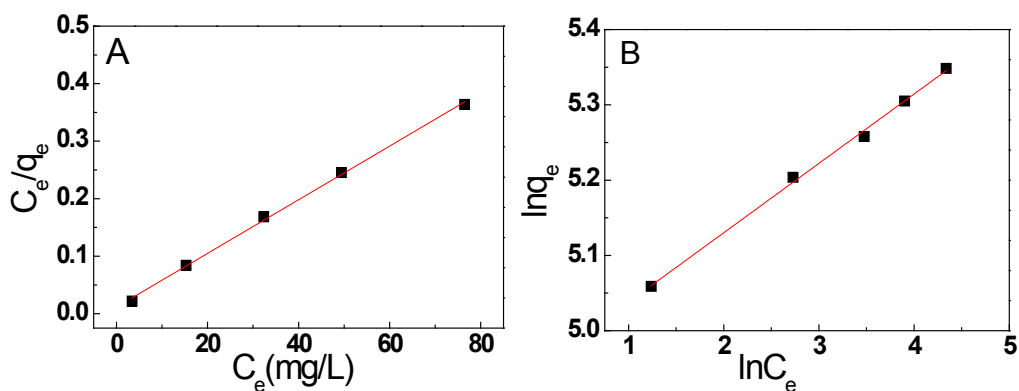

**Figure S6.** (A) Langmuir isotherm and (B) Freundlich isotherm models linearized plots for Th(IV) sorption on GO.

**Table S2.** The Langmuir isotherm and Freundlich isotherm models constants of the Th(IV) sorption onto GO.

| Langmuir     |              |       | Freundlich   |        |       |
|--------------|--------------|-------|--------------|--------|-------|
| $q_m$ (mg/g) | $k_L$ (L/mg) | $R^2$ | $k_F$ (mg/g) | $n$    | $R^2$ |
| 214.6        | 0.402        | 0.998 | 140.6        | 10.857 | 0.997 |

**Table S3.** Maximum sorption capacity of various sorbents for Th(IV) ions

| Sorbents                                                                               | $Q_{max}$ (mg/g) | Conditions                | References |
|----------------------------------------------------------------------------------------|------------------|---------------------------|------------|
| composite matrix                                                                       | 110.5            | pH 5.5, 303K              | 2          |
| Al-MCM-41                                                                              | ~70              | pH $3.4 \pm 0.1$ , 293K   | 3          |
| calcined diatomite                                                                     | 121.22           | pH 4.0, 298K              | 4          |
| activated carbon                                                                       | 21.28            | pH 4.0, 303K              | 5          |
| Amine modified silica gel                                                              | 96               | pH 3.5, 298K              | 6          |
| tannin-modified poly(glycidylmethacrylate)-grafted zirconium oxide-densified cellulose | 96.7             | pH 5.5, 303K              | 7          |
| GO                                                                                     | 214.6            | pH $2.60 \pm 0.05$ , 293K | This work  |

**Table S4.** Average bond lengths (Å) of optimized binding geometries for the coordination of Th(IV) with GO by the B3LYP Method.

| motifs                              | A     | B     | C     | D     | E     | F     | G     |
|-------------------------------------|-------|-------|-------|-------|-------|-------|-------|
| Th-O(COOH/OH <sup>-</sup> )         | 2.303 | 2.506 | 2.469 | 2.356 | 2.429 | 2.567 | 2.524 |
| Th-O(NO <sub>3</sub> <sup>-</sup> ) | 2.456 | 2.436 | 2.442 | 2.497 | 2.487 | 2.475 | 2.481 |

**Table S5.** Mayer Bond Orders (MBO) of Th-O bonds and Natural Charges on the Th and O atoms for the complexes obtained by the B3LYP method.

| motifs | Th-O <sub>C</sub> | Th-O <sub>N</sub> | Q(Th) | Q(O <sub>C</sub> ) | Q(O <sub>N</sub> ) |
|--------|-------------------|-------------------|-------|--------------------|--------------------|
| A      | 0.458             | 0.405             | 1.958 | -0.772             | -0.521             |
| B      | 0.257             | 0.434             | 1.007 | -0.381             | -0.262             |
| C      | 0.325             | 0.424             | 1.992 | -0.802             | -0.522             |
| D      | 0.402             | 0.375             | 1.776 | -0.729             | -0.491             |
| E      | 0.311             | 0.381             | 1.809 | -0.673             | -0.495             |
| F      | 0.210             | 0.395             | 1.817 | -0.720             | -0.496             |
| G      | 0.276             | 0.388             | 1.796 | -0.750             | -0.492             |

## Reference

- 1 L. J. Cote, F. Kim and J. Huang, *J. Am. Chem. Soc.*, 2008, **131**, 1043-1049.
- 2 T. S. Anirudhan, S. Rijith and V. R. N. Ratheesh, *Desalin. Water Treat.*, 2012, **38**, 79-89.
- 3 L. Zuo, S. Yu, H. Zhou, X. Tian and J. Jiang, *J. Radioanal. Nucl. Chem.*, 2011, **288**, 379-387.
- 4 S. Yusan, C. Gok, S. Erenturk and S. Aytas, *Appl. Clay. Sci.*, 2012, **67-68**, 106-116.
- 5 C. Kuumltahyalinodot and M. Eral, *J. Nucl. Mater.*, 2010, **396**, 251-256.
- 6 A. M. Donia, A. A. Atia, A. M. Daher, O. A. Desouky and E. A. Elshehy, *J. Radioanal. Nucl. Chem.*, 2011, **290**, 297-306.
- 7 T. S. Anirudhan and S. R. Rejeena, *Ind. Eng. Chem. Res.*, 2011, **50**, 13288-13298.
